# Supplementary material for: Classification and quantitative characterisation of the excited states of π-conjugated diradicals
Source: Royal Society of Chemistry journal article supplement (doi:10.1039/d4fd00055b), 2024-01-01
Supplement: d4fd00055b1.pdf [file d4fd00055b1.pdf]

# Supporting Information for

## Classification and quantitative characterisation of the excited states of $\pi$ -conjugated diradicals

Lujo Matasović,<sup>†</sup> Hugo Bronstein,<sup>‡</sup> Richard H. Friend,<sup>†</sup> and Felix Plasser\*,<sup>¶</sup>

<sup>†</sup>*Cavendish Laboratory, University of Cambridge, Cambridge, UK*

<sup>‡</sup>*Yusuf Hamied Department of Chemistry, University of Cambridge, Cambridge, UK*

<sup>¶</sup>*Department of Chemistry, Loughborough University, Loughborough, LE11 3TU, United  
Kingdom*

E-mail: f.plasser@lboro.ac.uk

Phone: +44 1509 226946

# S1 – Derivation of descriptors

In this section we sketch the derivation of the values of the wave function descriptors within the two-orbital two-electron model. As described in the main text, we consider the four states:

$$|\Psi_0\rangle = \cos(\eta)|\phi_H\bar{\phi}_H\rangle - \sin(\eta)|\phi_L\bar{\phi}_L\rangle \quad (1)$$

$$|\Psi_T\rangle = \frac{1}{\sqrt{2}} (|\phi_H\bar{\phi}_L\rangle - |\phi_L\bar{\phi}_H\rangle) \quad (2)$$

$$|\Psi_Z\rangle = \frac{1}{\sqrt{2}} (|\phi_H\bar{\phi}_L\rangle + |\phi_L\bar{\phi}_H\rangle) \quad (3)$$

$$|\Psi_1\rangle = \sin(\eta)|\phi_H\bar{\phi}_H\rangle + \cos(\eta)|\phi_L\bar{\phi}_L\rangle \quad (4)$$

We start by finding the matrix representation of the one-electron transition densities for each excited state with respect to the ground state  $\Psi_0$ . Using the creation and annihilation operators referring to orbitals  $\phi_p$  and  $\phi_q$  we can write for a general matrix element:

$$D_{pq}^{0J} = \langle\Psi_0|a_p^\dagger a_q|\Psi_J\rangle \quad (5)$$

where  $p$  and  $q$  refer to  $H, \bar{H}, L$  and  $\bar{L}$  orbitals. The spin-traced transition densities read:

$$\mathbf{D}^{01} = \frac{\sin 2\eta}{\sqrt{2}} \begin{pmatrix} 1 & 0 \\ 0 & -1 \end{pmatrix} \quad (6)$$

$$\mathbf{D}^{0Z} = \begin{pmatrix} 0 & \cos \eta \\ -\sin \eta & 0 \end{pmatrix} \quad (7)$$

$$\mathbf{D}^{0T} = \begin{pmatrix} 0 & -\cos \eta \\ -\sin \eta & 0 \end{pmatrix} \quad (8)$$

Note that a factor  $\sqrt{2}$  has been absorbed into these expressions to account for the separate  $\alpha\alpha$  and  $\beta\beta$  contributions. Squaring the norm of calculated densities, we acquire the one-electron

excitation character,  $\Omega$ :

$$\Omega^{01} = \|\mathbf{D}^{01}\|^2 = \sin^2 2\eta \quad (9)$$

$$\Omega^{0T} = \|\mathbf{D}^{0T}\|^2 = \Omega^{0Z} = \|D^{0Z}\|^2 = \sin^2 \eta + \cos^2 \eta = 1 \quad (10)$$

Next we compute the particle-hole permutation operator expectation values for each transition of interest:

$$\langle P_{he} \rangle^{0J} = \frac{1}{\Omega^{0J}} \sum_{pq} D_{pq} D_{qp} \quad (11)$$

$$\langle P_{he} \rangle^{01} = 1 \quad (12)$$

$$\langle P_{he} \rangle^{0T} = \sin \eta \cos \eta + \cos \eta \sin \eta = \sin 2\eta \quad (13)$$

$$\langle P_{he} \rangle^{0Z} = -\sin \eta \cos \eta - \cos \eta \sin \eta = -\sin 2\eta \quad (14)$$

In a similar fashion, we calculate the spin-traced one-electron density matrix for each state:

$$\mathbf{D}^{00} = 2 \begin{pmatrix} \cos^2 \eta & 0 \\ 0 & \sin^2 \eta \end{pmatrix} \quad (15)$$

$$\mathbf{D}^{11} = 2 \begin{pmatrix} \sin^2 \eta & 0 \\ 0 & \cos^2 \eta \end{pmatrix} \quad (16)$$

$$\mathbf{D}^{ZZ} = D^{TT} = \begin{pmatrix} 1 & 0 \\ 0 & 1 \end{pmatrix} \quad (17)$$

These are diagonal, meaning that the orbitals are already natural orbitals. We can, thus, directly obtain the number of unpaired electrons as:

$$n_{u,nl}^0 = n_{u,nl}^1 = (4 \cos^4 \eta (2 - 2 \cos^2 \eta)^2 + 4 \sin^4 \eta (2 - 2 \sin^2 \eta)^2) = 2 \sin^4(2\eta) \quad (18)$$

$$n_{u,nl}^T = n_{u,nl}^Z = 2 \quad (19)$$

Next, we calculate difference density matrices:

$$\mathbf{D}_{\Delta}^{0Z} = \mathbf{D}_{\Delta}^{0T} = \begin{pmatrix} 1 - 2 \cos^2 \eta & 0 \\ 0 & 1 - 2 \sin^2 \eta \end{pmatrix} \quad (20)$$

$$\mathbf{D}_{\Delta}^{01} = 2 \begin{pmatrix} \sin^2 \eta - \cos^2 \eta & 0 \\ 0 & \cos^2 \eta - \sin^2 \eta \end{pmatrix} \quad (21)$$

The promotion numbers are equivalent to one of the diagonal elements, since the matrix is diagonal and already has two entries (one for attachment and one for detachment)

$$p^{01} = 2(\cos^2 \eta - \sin^2 \eta) = 2 \cos 2\eta \quad (22)$$

$$p^{0T} = p^{0Z} = 1 - 2 \sin^2 \eta \quad (23)$$

Finally, we note for the transition dipole moment, e.g., its  $x$ -component:

$$\mu_x^{OZ} = \mu_x^{HL} \cos \eta - \mu_x^{HL} \sin \eta = \mu_x^{HL} (\cos \eta - \sin \eta) \quad (24)$$

$$(\mu_x^{OZ})^2 = (\mu_x^{HL})^2 (\cos \eta - \sin \eta)^2 = (\mu_x^{HL})^2 (1 - \sin 2\eta) \quad (25)$$

where  $\mu_x^{HL}$  is the  $x$ -component of the dipole moment integral between  $\phi_H$  and  $\phi_L$ . Analogous equations hold for the  $y$ - and  $z$ -components. The oscillator strength is given as

$$f^{0Z} = \frac{2}{3} \Delta E^{0Z} [(\mu_x^{HL})^2 + (\mu_y^{HL})^2 + (\mu_z^{HL})^2] \quad (26)$$

If we approximate the energy gap ( $\Delta E^{0Z}$ ) and  $\mu_x^{HL}$  as being constant, then we obtain:

$$f^{0Z} = f_0 (1 - \sin 2\eta) \quad (27)$$

$$f_0 = \frac{2}{3} \Delta E^{0Z} [(\mu_x^{HL})^2 + (\mu_y^{HL})^2 + (\mu_z^{HL})^2] \quad (28)$$

## S2 – Computational details

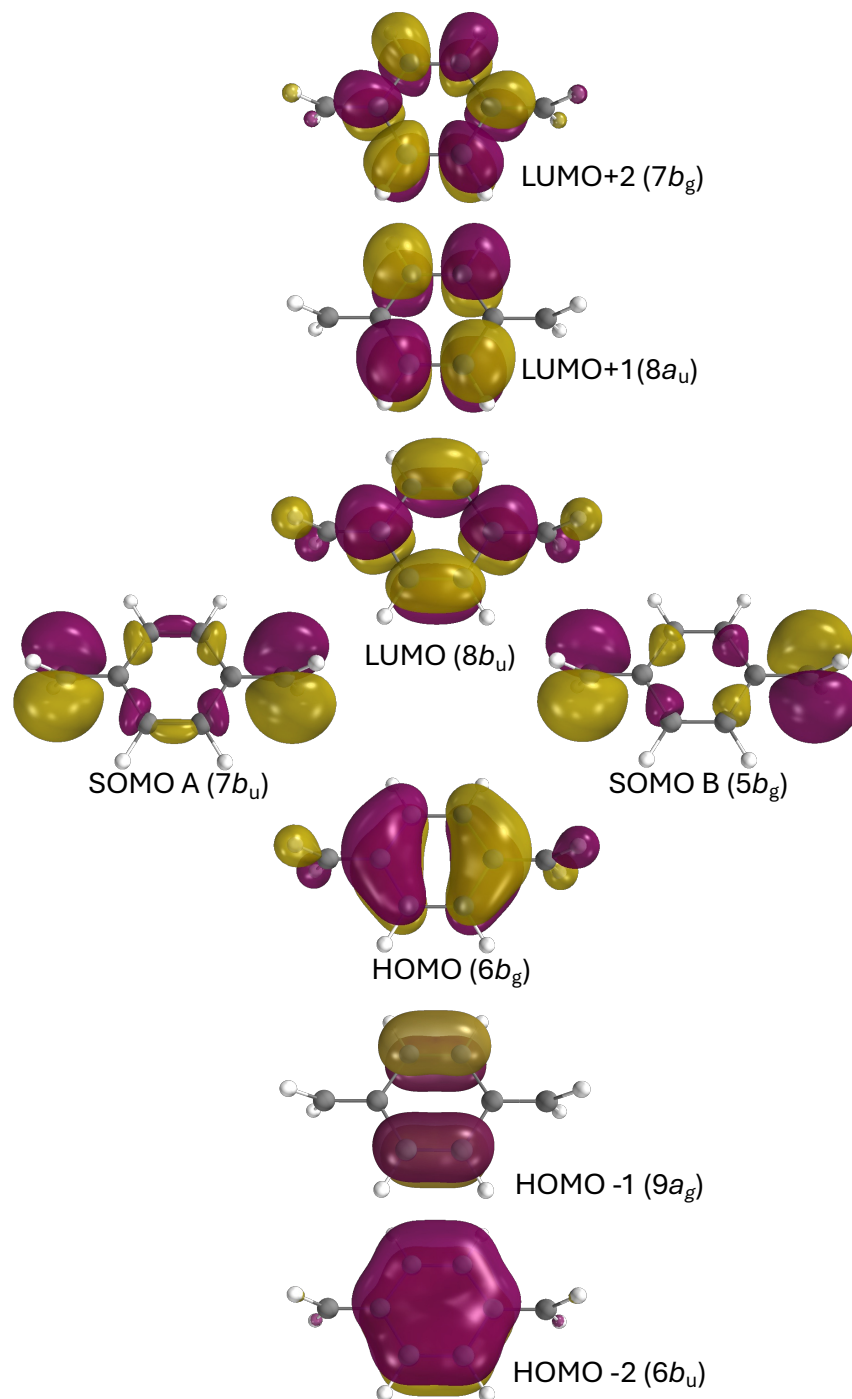

Figure S1: Orbitals in the active space for the CASSCF(8,8) computations performed.

### S3 – Descriptors of all states at CASSCF level of theory

Table S1: Analysis of the excited states of pQDM at the planar geometry ( $\theta = 0^\circ$ ): vertical excitation energies ( $\Delta E$ , eV), oscillator strengths ( $f$ ) and wave function descriptors, calculated at CASSCF level of theory.

| $\theta = 0^\circ$ |            |        |          |          |          |            |       |
|--------------------|------------|--------|----------|----------|----------|------------|-------|
| State              | $\Delta E$ | $f$    | $\Omega$ | $P_{he}$ | $R_{he}$ | $n_{u,nl}$ | $p$   |
| $1^1A_g$           | 0.000      | -      | -        | -        | -        | 0.316      | -     |
| $1^3A_u$           | 2.047      | -      | 0.940    | 0.556    | 0.501    | 2.220      | 1.050 |
| $1^3A_g$           | 4.279      | -      | 0.857    | 0.301    | 0.595    | 2.660      | 0.968 |
| $2^1A_g$           | 4.764      | -      | 0.383    | 0.322    | -0.011   | 2.780      | 1.396 |
| $2^3A_u$           | 5.079      | -      | 0.870    | 0.302    | 0.426    | 2.722      | 1.101 |
| $3^3A_u$           | 6.356      | -      | 0.433    | 0.212    | 0.472    | 3.731      | 1.454 |
| $1^1A_u$           | 6.633      | 1.214  | 0.839    | -0.400   | -0.062   | 2.079      | 1.043 |
| $2^3A_g$           | 7.469      | -      | 0.096    | 0.221    | 0.543    | 4.305      | 1.903 |
| $2^1A_u$           | 7.631      | 0.044  | 0.370    | 0.105    | 0.158    | 3.430      | 1.464 |
| $3^1A_g$           | 7.699      | -      | 0.057    | 0.422    | -0.577   | 4.230      | 1.837 |
| $4^3A_u$           | 8.071      | -      | 0.341    | 0.055    | -0.035   | 3.886      | 1.653 |
| $3^3A_g$           | 8.546      | -      | 0.741    | -0.007   | -0.304   | 2.593      | 0.973 |
| $4^1A_g$           | 9.18       | -      | 0.154    | -0.175   | 0.180    | 4.344      | 1.721 |
| $5^1A_g$           | 9.221      | -      | 0.745    | -0.373   | 0.389    | 2.824      | 1.087 |
| $4^3A_g$           | 9.379      | -      | 0.242    | 0.109    | 0.231    | 4.522      | 1.951 |
| $5^3A_u$           | 9.539      | -      | 0.022    | 0.009    | 0.012    | 5.174      | 2.186 |
| $3^1A_u$           | 9.748      | 0.829  | 0.863    | -0.197   | 0.037    | 2.445      | 1.232 |
| $6^1A_g$           | 10.204     | -      | 0.331    | 0.060    | -0.128   | 3.669      | 1.520 |
| $4^1A_u$           | 10.835     | 0.051  | 0.588    | -0.070   | -0.381   | 2.872      | 1.227 |
| $6^3A_u$           | 10.963     | -      | 0.144    | 0.067    | -0.288   | 4.576      | 1.859 |
| $7^1A_g$           | 10.995     | -      | 0.295    | 0.331    | -0.589   | 3.852      | 1.684 |
| $5^3A_g$           | 11.148     | -      | 0.025    | 0.0530   | -0.257   | 4.120      | 1.902 |
| $5^1A_u$           | 11.566     | 0.0410 | 0.743    | -0.301   | 0.410    | 2.801      | 1.245 |
| $6^3A_g$           | 11.782     | -      | 0.0250   | 0.136    | 0.003    | 5.367      | 2.343 |
| $6^1A_u$           | 12.687     | 0.022  | 0.495    | -0.016   | 0.160    | 3.243      | 1.418 |
| $8^1A_g$           | 12.888     | -      | 0.028    | 0.470    | -0.267   | 4.028      | 1.787 |

Table S2: Analysis of the excited states of pQDM at the twisted geometry ( $\theta = 90^\circ$ ): vertical excitation energies ( $\Delta E$ , eV), oscillator strengths ( $f$ ) and wave function descriptors, at the CASSCF level of theory.

| $\theta = 90^\circ$ |            |       |          |          |          |            |       |
|---------------------|------------|-------|----------|----------|----------|------------|-------|
| State               | $\Delta E$ | $f$   | $\Omega$ | $P_{he}$ | $R_{he}$ | $n_{u,nl}$ | $p$   |
| $1^3A_u$            | -0.151     | -     | 0.995    | 0.995    | 0.814    | 2.214      | 0.239 |
| $1^1A_g$            | 0.000      | -     | -        | -        | -        | 2.197      | -     |
| $2^3A_u$            | 2.784      | -     | 0.969    | 0.515    | 0.324    | 4.156      | 1.105 |
| $1^3A_g$            | 2.925      | -     | 0.000    | -0.073   | 0.233    | 4.157      | 1.048 |
| $2^1A_g$            | 3.059      | -     | 0.000    | 0.491    | 0.103    | 4.157      | 0.955 |
| $3^3A_u$            | 4.912      | -     | 0.822    | 0.233    | 0.200    | 4.346      | 1.192 |
| $1^1A_u$            | 5.003      | -     | 0.444    | -0.003   | 0.232    | 2.127      | 1.129 |
| $2^3A_g$            | 5.046      | -     | 0.000    | 0.839    | 0.701    | 4.316      | 1.131 |
| $3^1A_g$            | 5.258      | -     | 0.000    | 0.654    | -0.343   | 4.338      | 1.036 |
| $4^3A_u$            | 5.381      | -     | 0.441    | 0.003    | 0.212    | 2.121      | 1.142 |
| $4^1A_g$            | 5.449      | -     | 0.405    | -0.006   | 0.260    | 2.143      | 1.030 |
| $3^3A_g$            | 5.671      | -     | 0.403    | 0.008    | 0.242    | 2.131      | 1.133 |
| $5^3A_u$            | 6.269      | -     | 0.000    | 0.091    | 0.025    | 5.126      | 1.380 |
| $4^3A_g$            | 6.329      | -     | 0.649    | 0.194    | 0.382    | 5.1        | 1.307 |
| $6^3A_u$            | 6.587      | -     | 0.000    | 0.135    | 0.019    | 4.966      | 1.594 |
| $2^1A_u$            | 6.700      | -     | 0.443    | -0.002   | 0.189    | 2.108      | 1.139 |
| $5^1A_g$            | 6.730      | -     | 0.397    | 0.160    | -0.110   | 4.948      | 1.393 |
| $5^3A_g$            | 6.827      | -     | 0.402    | -0.001   | 0.203    | 2.118      | 1.129 |
| $3^1A_u$            | 6.892      | 0.001 | 0.002    | -0.403   | -0.142   | 5.036      | 1.314 |
| $6^1A_g$            | 6.997      | -     | 0.406    | -0.001   | 0.212    | 2.119      | 1.044 |
| $6^3A_g$            | 7.229      | -     | 0.000    | 0.186    | 0.082    | 4.102      | 0.984 |
| $4^1A_u$            | 7.503      | 0.383 | 0.871    | -0.377   | -0.151   | 3.801      | 1.072 |
| $5^1A_u$            | 7.803      | 0.068 | 0.766    | -0.934   | -0.759   | 2.346      | 0.509 |
| $7^1A_g$            | 8.216      | -     | 0.768    | 1.000    | -0.803   | 2.329      | 0.235 |
| $8^1A_g$            | 8.685      | -     | 0.248    | 0.001    | 0.001    | 3.271      | 1.356 |
| $6^1A_u$            | 8.747      | -     | 0.220    | -0.001   | 0.008    | 3.291      | 1.450 |
| $9^1A_g$            | 10.082     | -     | 0.001    | 0.085    | -0.177   | 6.552      | 1.768 |

# S4 – Descriptors of all states at MS-CASPT2 level of theory

Table S3: Analysis of the excited states of pQDM at the planar geometry ( $\theta = 0^\circ$ ): vertical excitation energies ( $\Delta E$ , eV), oscillator strengths (f) and wave function descriptors.

| $\theta = 0^\circ$ |            |       |          |          |          |            |       |
|--------------------|------------|-------|----------|----------|----------|------------|-------|
| State              | $\Delta E$ | $f$   | $\Omega$ | $P_{he}$ | $R_{he}$ | $n_{u,nl}$ | $p$   |
| $1^1A_g$           | 0.000      | -     | -        | -        | -        | 0.142      | -     |
| $1^3A_u$           | 2.279      | 0.000 | 0.930    | 0.381    | 0.353    | 2.153      | 1.128 |
| $1^3A_g$           | 4.712      | 0.000 | 0.863    | 0.253    | 0.520    | 2.615      | 1.113 |
| $1^1A_u$           | 4.784      | 1.447 | 0.843    | -0.265   | -0.048   | 2.067      | 1.156 |
| $2^1A_g$           | 4.889      | 0.000 | 0.465    | 0.113    | -0.121   | 2.838      | 1.405 |
| $2^3A_u$           | 5.363      | 0.000 | 0.886    | 0.315    | 0.352    | 2.677      | 1.232 |
| $2^3A_g$           | 6.639      | 0.000 | 0.822    | 0.063    | -0.282   | 2.575      | 1.033 |
| $3^3A_u$           | 6.993      | 0.000 | 0.468    | 0.168    | 0.397    | 3.697      | 1.542 |
| $3^1A_g$           | 7.045      | 0.000 | 0.897    | -0.316   | 0.351    | 2.596      | 1.048 |
| $4^1A_g$           | 7.312      | 0.000 | 0.241    | 0.133    | -0.451   | 3.397      | 1.622 |
| $2^1A_u$           | 7.508      | 0.191 | 0.579    | -0.045   | 0.021    | 3.107      | 1.395 |
| $3^1A_u$           | 7.673      | 0.494 | 0.777    | -0.238   | 0.060    | 2.870      | 1.329 |
| $3^3A_g$           | 7.838      | 0.000 | 0.044    | 0.139    | 0.532    | 4.255      | 2.062 |
| $4^3A_u$           | 8.047      | 0.000 | 0.390    | 0.054    | 0.061    | 3.746      | 1.657 |
| $5^1A_g$           | 8.909      | 0.000 | 0.160    | 0.155    | -0.311   | 4.174      | 1.899 |
| $4^1A_u$           | 9.086      | 0.018 | 0.632    | -0.034   | -0.369   | 2.925      | 1.306 |
| $5^1A_u$           | 9.378      | 0.006 | 0.813    | -0.253   | 0.436    | 2.631      | 1.266 |
| $6^1A_g$           | 9.506      | 0.000 | 0.014    | 0.264    | -0.309   | 4.298      | 2.011 |
| $4^3A_g$           | 9.542      | 0.000 | 0.078    | 0.128    | 0.067    | 4.223      | 1.939 |
| $5^3A_g$           | 9.858      | 0.000 | 0.232    | 0.103    | 0.275    | 4.527      | 1.960 |
| $5^3A_u$           | 10.111     | 0.000 | 0.024    | -0.034   | -0.298   | 5.168      | 2.241 |
| $6^1A_u$           | 10.380     | 0.004 | 0.324    | 0.070    | 0.009    | 3.335      | 1.681 |
| $7^1A_g$           | 10.694     | 0.000 | 0.043    | 0.112    | -0.316   | 4.443      | 1.983 |
| $6^3A_u$           | 10.977     | 0.000 | 0.072    | 0.067    | -0.218   | 4.837      | 2.103 |
| $8^1A_g$           | 11.008     | 0.000 | 0.141    | 0.079    | -0.383   | 4.571      | 1.839 |
| $6^3A_g$           | 12.251     | 0.000 | 0.024    | 0.155    | 0.078    | 5.370      | 2.420 |



Table S4: Analysis of the excited states of pQDM at the twisted geometry ( $\theta = 90^\circ$ ): vertical excitation energies ( $\Delta E$ , eV), oscillator strengths (f) and wave function descriptors.

| $\theta = 90^\circ$ |            |       |          |          |          |            |       |
|---------------------|------------|-------|----------|----------|----------|------------|-------|
| State               | $\Delta E$ | f     | $\Omega$ | $P_{he}$ | $R_{he}$ | $n_{u,ml}$ | p     |
| $1^1A_g$            | 0.000      | -     | -        | -        | -        | 2.172      | -     |
| $1^3A_u$            | 0.118      | 0.000 | 0.993    | 0.992    | 0.810    | 2.207      | 0.294 |
| $2^1A_g$            | 3.354      | 0.000 | 0.000    | -        | -        | 4.131      | 1.001 |
| $1^3A_g$            | 3.411      | 0.000 | 0.000    | -        | -        | 4.131      | 1.101 |
| $2^3A_u$            | 3.469      | 0.000 | 0.948    | 0.483    | 0.306    | 4.130      | 1.154 |
| $1^1A_u$            | 3.622      | 0.000 | 0.465    | 0.007    | 0.242    | 2.128      | 1.123 |
| $3^3A_u$            | 3.789      | 0.000 | 0.454    | 0.003    | 0.204    | 2.121      | 1.177 |
| $3^1A_g$            | 3.935      | 0.000 | 0.397    | 0.004    | 0.278    | 2.145      | 1.046 |
| $2^3A_g$            | 3.970      | 0.000 | 0.386    | -0.002   | 0.235    | 2.131      | 1.178 |
| $4^1A_g$            | 4.613      | 0.000 | 0.764    | 1.000    | -0.797   | 2.316      | 0.327 |
| $2^1A_u$            | 4.691      | 0.000 | 0.754    | -0.972   | -0.776   | 2.331      | 0.341 |
| $3^1A_u$            | 4.854      | 0.000 | 0.465    | -0.012   | 0.201    | 2.110      | 1.131 |
| $5^1A_g$            | 5.026      | 0.000 | 0.395    | -0.011   | 0.214    | 2.117      | 1.063 |
| $4^3A_u$            | 5.161      | 0.000 | 0.832    | 0.251    | 0.216    | 4.309      | 1.233 |
| $6^1A_g$            | 5.162      | 0.000 | 0.000    | -        | -        | 4.295      | 1.067 |
| $3^3A_g$            | 5.180      | 0.000 | 0.385    | 0.008    | 0.196    | 2.118      | 1.161 |
| $4^3A_g$            | 5.188      | 0.000 | 0.000    | -        | -        | 4.282      | 1.173 |
| $5^3A_g$            | 5.540      | 0.000 | 0.000-   | -        | 4.102    | 1.024      |       |
| $4^1A_u$            | 5.650      | 0.349 | 0.889    | -0.331   | -0.086   | 4.061      | 1.031 |
| $5^1A_u$            | 6.727      | 0.000 | 0.000    | -        | -        | 5.041      | 1.311 |
| $6^3A_g$            | 6.801      | 0.000 | 0.655    | 0.204    | 0.387    | 5.101      | 1.345 |
| $5^3A_u$            | 6.909      | 0.000 | 0.000    | -        | -        | 5.129      | 1.429 |
| $7^1A_g$            | 7.126      | 0.000 | 0.389    | 0.139    | -0.118   | 4.918      | 1.438 |
| $8^1A_g$            | 7.142      | 0.000 | 0.254    | 0.001    | -0.003   | 3.271      | 1.364 |
| $6^3A_u$            | 7.260      | 0.000 | 0.000    | -        | -        | 4.953      | 1.651 |
| $6^1A_u$            | 7.356      | 0.000 | 0.211    | -0.001   | -0.003   | 3.290      | 1.442 |

Table S5: States of  $B$  for geometry at  $\theta = 90^\circ$ : vertical excitation energies ( $\Delta E$ , eV), oscillator strengths ( $f$ ) and wave function descriptors. All  $B$  states are high in energy

| $\theta = 90^\circ$ |            |       |          |          |          |            |       |
|---------------------|------------|-------|----------|----------|----------|------------|-------|
| State               | $\Delta E$ | $f$   | $\Omega$ | $P_{he}$ | $R_{he}$ | $n_{u,nl}$ | $p$   |
| $1^1B_g$            | 4.704      | 0.000 | 0.000    | -        | -        | 4.473      | 1.164 |
| $1^1B_u$            | 4.753      | 0.007 | 0.730    | 0.301    | 0.105    | 4.675      | 1.179 |
| $1^3B_u$            | 4.787      | 0.000 | 0.728    | 0.111    | 0.057    | 4.653      | 1.305 |
| $1^3B_g$            | 4.826      | 0.000 | 0.000    | -        | -        | 4.670      | 1.304 |
| $2^3B_g$            | 4.899      | 0.000 | 0.000    | -        | -        | 4.729      | 1.318 |
| $2^1B_u$            | 5.078      | 0.000 | 0.422    | -0.004   | 0.011    | 2.249      | 1.315 |
| $2^1B_g$            | 5.381      | 0.000 | 0.351    | -0.005   | 0.009    | 2.278      | 1.369 |
| $3^1B_g$            | 5.547      | 0.000 | 0.000    | -        | -        | 4.289      | 1.062 |
| $3^1B_u$            | 5.979      | 0.000 | 0.437    | -0.001   | 0.011    | 2.198      | 1.287 |
| $4^1B_g$            | 6.143      | 0.000 | 0.370    | 0.004    | 0.009    | 2.201      | 1.294 |
| $4^1B_u$            | 6.565      | 0.701 | 0.902    | -0.428   | 0.046    | 4.522      | 1.188 |
| $5^1B_u$            | 7.286      | 0.000 | 0.000    | -        | -        | 5.242      | 1.422 |
| $2^3B_u$            | 7.392      | 0.000 | 0.000    | -        | -        | 5.302      | 1.562 |
| $5^1B_g$            | 8.297      | 0.000 | 0.408    | 0.038    | -0.173   | 5.182      | 1.608 |
| $6^1B_g$            | 9.812      | 0.000 | 0.136    | -0.407   | 0.364    | 5.097      | 1.883 |
| $6^1B_u$            | 10.116     | 0.000 | 0.000    | -        | -        | 6.417      | 2.089 |

## S5 – Output of configurations in MS-CASPT2 computations.

Table S6: Prominent configurations and their weights for the planar geometry of pQDM computed at the MS-CASPT2 level of theory. Only the configurations with weights above 15% are presented.

| $\theta = 0^\circ$ |                    |               |
|--------------------|--------------------|---------------|
| State              | CI weight          | Configuration |
| $1^1 A_g$          | 0.88               | 2 020 0 220   |
| $1^3 A_u$          | 0.81               | 2 u20 0 2u0   |
| $1^3 A_g$          | 0.31               | 2 020 0 2uu   |
|                    | 0.44               | 2 uu0 0 220   |
| $1^1 A_u$          | 0.85               | 2 u20 0 2d0   |
|                    | 0.30               | 2 220 0 200   |
|                    | 0.27               | 2 ud0 0 220   |
| $2^1 A_g$          | 0.18               | 2 020 0 2ud   |
|                    | Highly mixed state |               |
|                    | 0.47               | 2 020 0 2uu   |
| $2^3 A_g$          | 0.37               | 2 uu0 0 220   |
|                    | 0.19               | 2 2u0 0 2u0   |
| $3^3 A_u$          | 0.17               | 2 u20 0 20u   |
|                    | 0.29               | 2 ud0 0 220   |
| $3^1 A_g$          | 0.53               | 2 020 0 2ud   |
|                    | 0.20               | 2 220 0 200   |
| $4^1 A_g$          | 0.18               | 2 ud0 0 220   |
|                    | 0.29               | 2 u20 0 d20   |
| $3^1 A_u$          | Highly mixed state |               |
| $3^3 A_g$          | 0.30               | u d20 u 2u0   |
| $4^3 A_u$          | 0.25               | 2 u20 0 u20   |
| $5^1 A_g$          | Highly mixed state |               |

Table S7: Prominent configurations and their weights for selected states of pQDM at twisted geometry computed at the MS-CASPT2 level of theory. Only the configurations with weights above 15% are presented.

| $\theta = 90^\circ$ |           |               |
|---------------------|-----------|---------------|
| State               | CI weight | Configuration |
| $1^1 A_g$           | 0.47      | 2 220 0 200   |
|                     | 0.40      | 2 020 0 220   |
| $1^3 A_u$           | 0.87      | 2 u20 0 2u0   |
| $2^1 A_g$           | 0.64      | 2 ud0 0 2ud   |
|                     | 0.21      | 2 uu0 0 2dd   |
| $1^3 A_g$           | 0.42      | 2 ud0 0 2uu   |
|                     | 0.29      | 2 uu0 0 2ud   |
| $2^3 A_u$           | 0.44      | 2 2u0 0 20u   |
|                     | 0.40      | 2 0u0 0 22u   |
| $1^1 A_u$           | 0.84      | 2 2u0 0 2d0   |
| $3^3 A_u$           | 0.84      | 2 2u0 0 2u0   |
| $3^1 A_g$           | 0.82      | 2 ud0 0 220   |
| $2^3 A_g$           | 0.83      | 2 uu0 0 220   |
| $4^1 A_g$           | 0.35      | 2 220 0 200   |
|                     | 0.40      | 2 020 0 220   |
| $2^1 A_u$           | 0.15      | 2 2u0 0 20d   |
|                     | 0.72      | 2 u20 0 2d0   |
| $3^1 A_u$           | 0.85      | 2 u20 0 20d   |
| $5^1 A_g$           | 0.84      | 2 020 0 2ud   |

## S6 – Potential curves

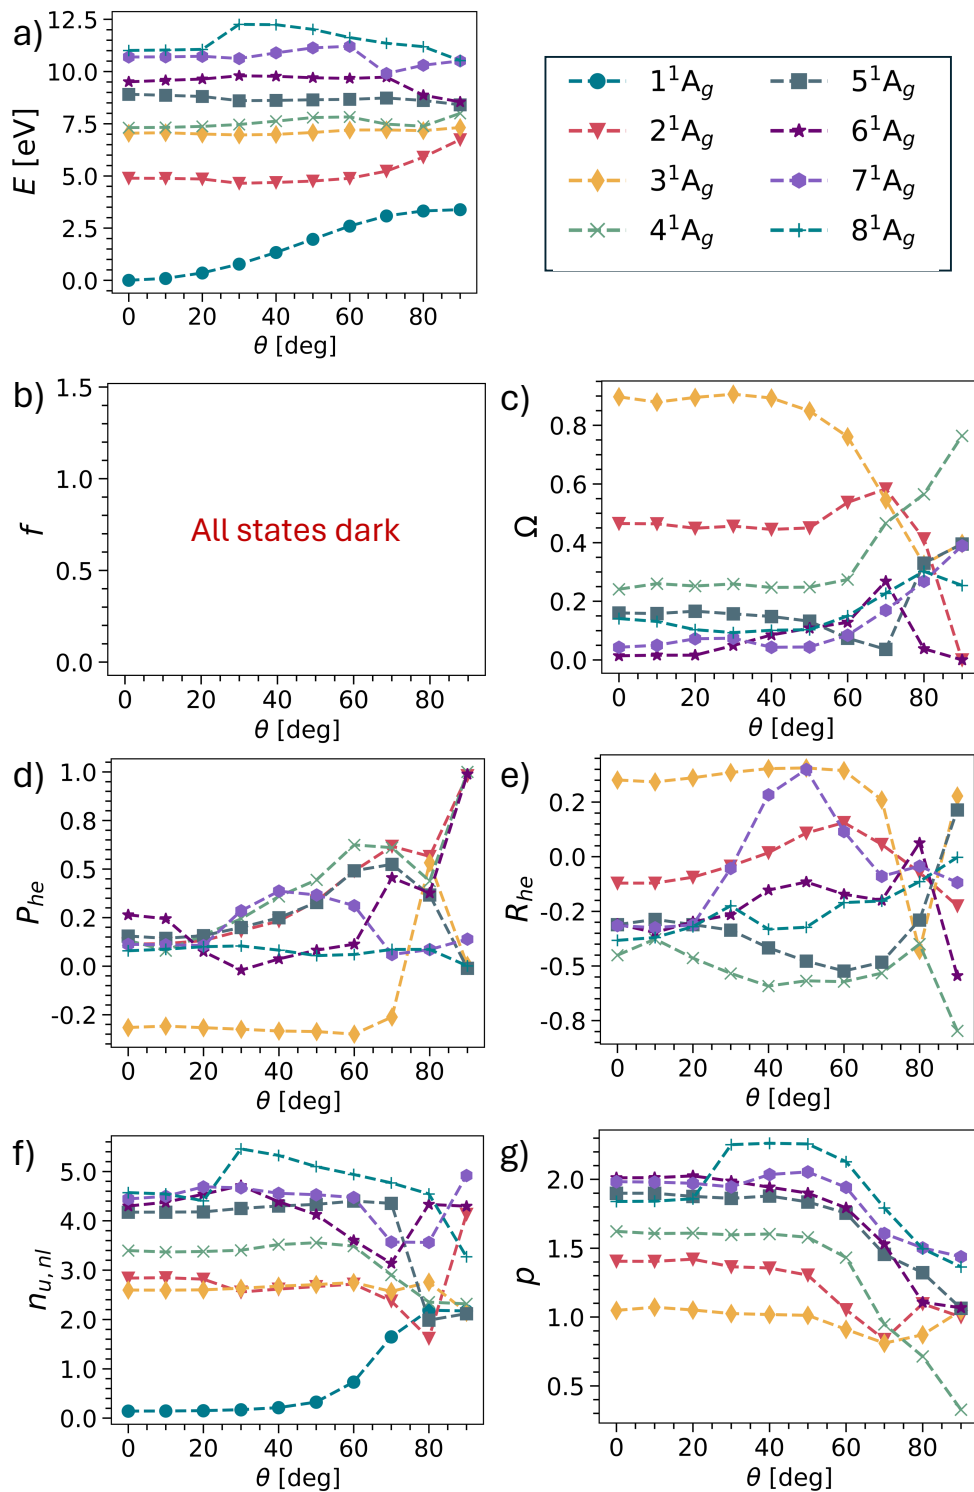

Figure S2: Potential curve of pQDM with change of the torsional angle,  $\theta$ . Singlets of  $A_g$  symmetry are presented.

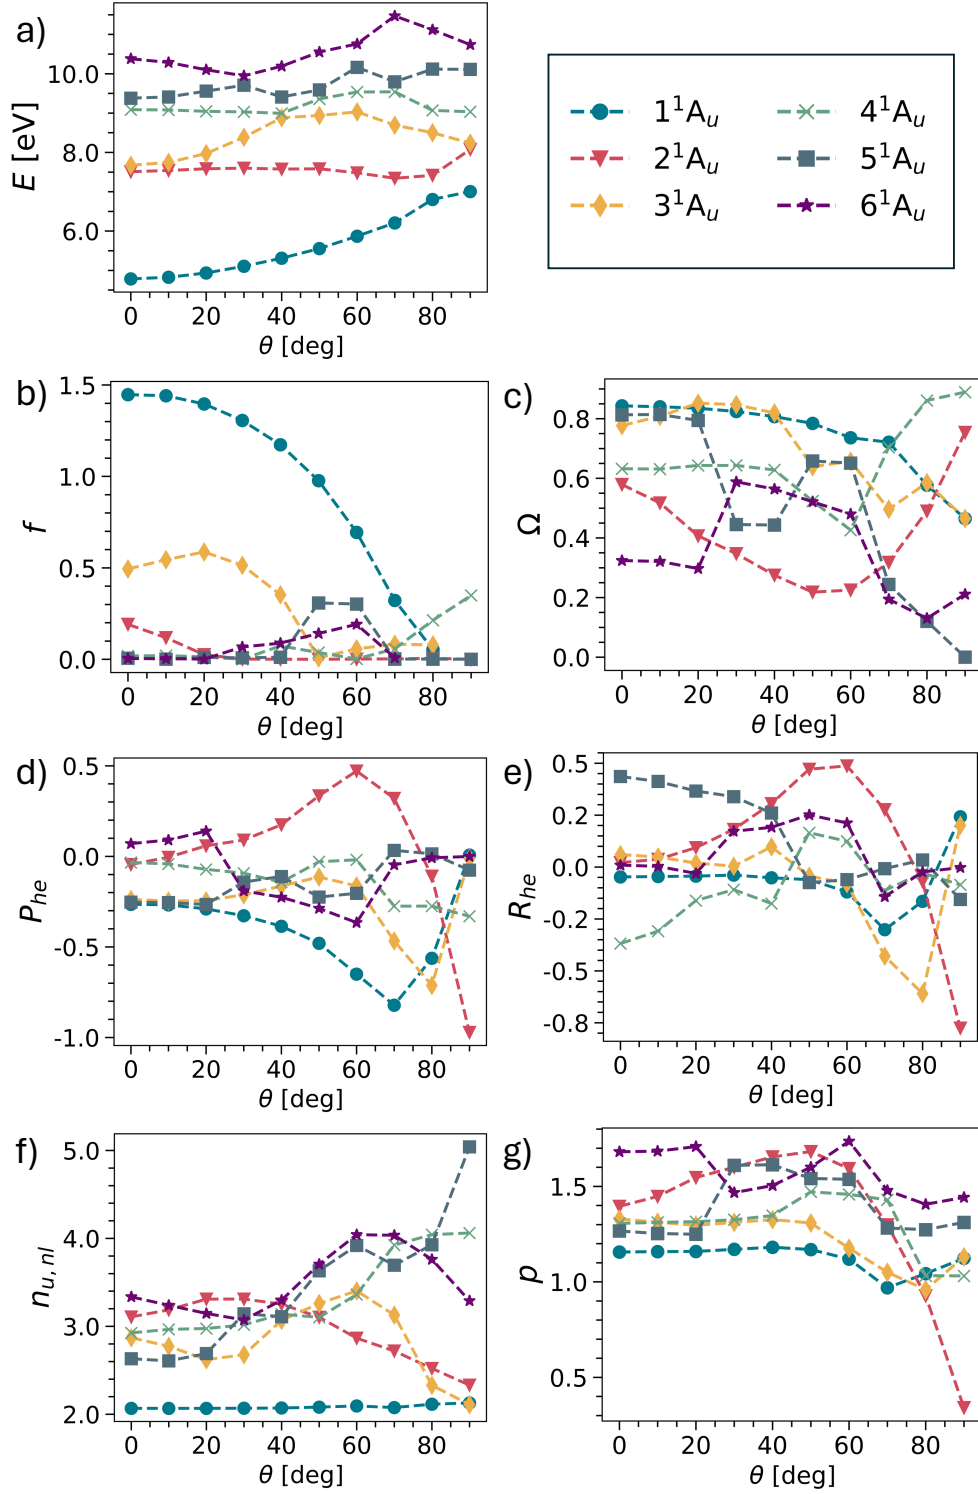

Figure S3: Potential curve of pQDM with change of the torsional angle,  $\theta$ . Singlets of  $A_u$  symmetry are presented.

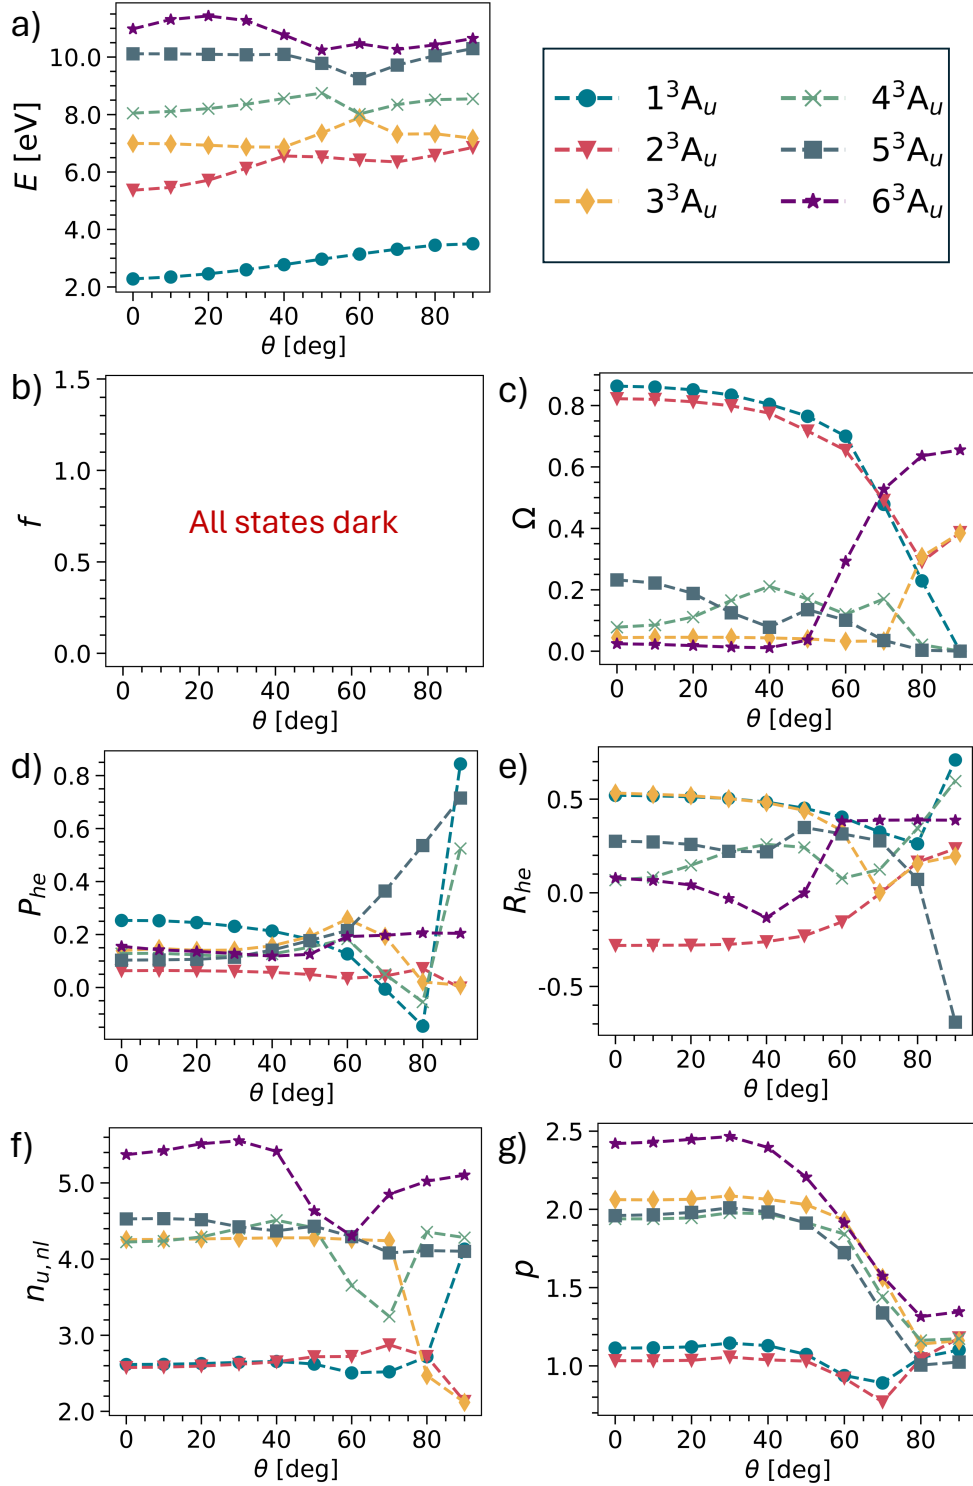

Figure S4: Potential curve of pQDM with change of the torsional angle,  $\theta$ . Triplets of  $A_g$  symmetry are presented.

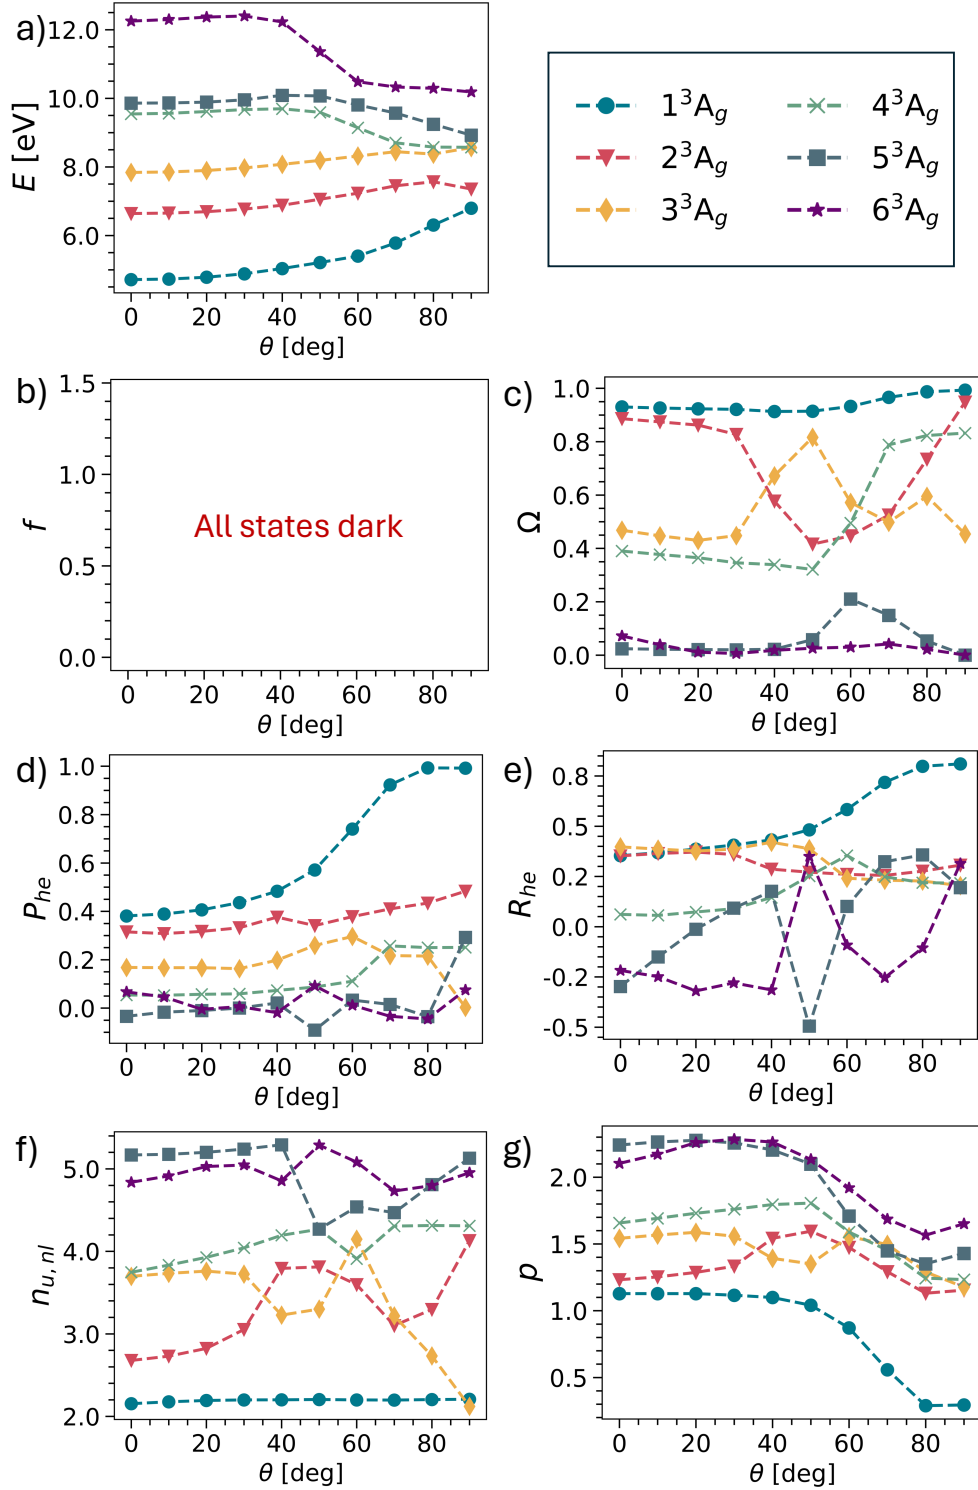

Figure S5: Potential curve of pQDM with change of the torsional angle,  $\theta$ . Triplets of  $A_u$  symmetry are presented.
